# Supplementary material for: Carbon Dots from Coffee Grounds: Synthesis, Characterization, and Detection of Noxious Nitroanilines
Source: MDPI journal article supplement (doi:10.3390/chemosensors10030113), 2022-03-15
Supplement: s1 [file s1]

Archive with 1 entries (1 files):
- chemosensors-1598512-supplementary.pdf
