# Supplementary material for: Carbon Dots from Coffee Grounds: Synthesis, Characterization, and Detection of Noxious Nitroanilines
Source: MDPI journal article supplement (doi:10.3390/chemosensors10030113), 2022-03-15
Supplement: s1 [file s1 › chemosensors-1598512-supplementary.pdf]

## Article

# Carbon Dots from Coffee Grounds: Synthesis, Characterization, and Detection of Noxious Nitroanilines

Alexandra I. Costa <sup>1,2</sup>, Patrícia D. Barata <sup>1,2</sup>, Bianca Moraes <sup>1,†</sup> and José V. Prata <sup>1,2,\*</sup>

<sup>1</sup> Departamento de Engenharia Química, Instituto Superior de Engenharia de Lisboa, Instituto Politécnico de Lisboa, R. Conselheiro Emídio Navarro, 1, 1959-007 Lisboa, Portugal

<sup>2</sup> Centro de Química-Vila Real, Universidade de Trás-os-Montes e Alto Douro, 5001-801 Vila Real, Portugal

\* Correspondence: jvprata@deq.isel.ipl.pt; Tel.: +351-218-317-172

† Present address: CTR, LDA, 2135-325 Samora Correia, Portugal.

## Supplementary Materials

### Table of Contents

**Table S1.** Organic composition of CGs and CBs.

**Table S2.** Dipole moments and hyperpolarizabilities of NAs.

**Figure S1.** FTIR spectra of CGsSV and CBsSV.

**Figure S2.** <sup>1</sup>H NMR spectra of CGsSV and CBsSV.

**Figure S3.** FTIR spectra of CGsNP and CBsNP.

**Figure S4.** FTIR spectra of CGsCQ and CBsCQ.

**Figure S5.** <sup>1</sup>H NMR spectra of C-dots from CGsSV by HTC method.

**Figure S6.** FTIR spectrum of C-dots' ashes from HTC method.

**Figure S7.** <sup>1</sup>H NMR spectrum of C-dots from CGsSV by Mw-HTC method.

**Figure S8.** Emission spectra of aqueous dispersions of C-dots obtained by HTC.

**Figure S9.** Intensity decay of aqueous solution of C-dots obtained by Mw-HTC.

**Figure S10.** UV-Vis and excitation spectra of aqueous dispersions of C-dots prepared at different temperatures.

**Figure S11.** Emission and excitation spectra of aqueous dispersions of C-dots prepared at different temperatures.

**Figure S12.** UV-Vis, emission, and excitation spectra of aqueous dispersions of C-dots prepared by Mw-HTC with different CGs concentration.

**Figure S13.** Emission spectra and Stern-Volmer plots of C-dots on titration with *o*-NA and *m*-NA.

**Table S1.** Organic composition of CGs and CBs.

| Parameter                        | Coffee Grounds |       |       | Coffee Beans |       |       |
|----------------------------------|----------------|-------|-------|--------------|-------|-------|
|                                  | CGsSV          | CGsCQ | CGsNP | CBsSV        | CBsCQ | CBsNP |
| <b>Total phenols<sup>1</sup></b> |                |       |       |              |       |       |
| (Equiv. gallic acid)             | 9.87           | 9.87  | 6.05  | 12.89        | 10.21 | 9.14  |
| (Equiv. tannic acid)             | 12.82          | 12.88 | 7.91  | 16.79        | 13.10 | 11.83 |
| (Equiv. vanilin)                 | 18.70          | 18.78 | 11.53 | 24.48        | 19.12 | 17.26 |
| <b>Flavonoids<sup>1</sup></b>    |                |       |       |              |       |       |
| (Equiv. quercetin)               | 3.24           | 2.43  | 2.01  | 2.81         | 2.10  | 1.62  |
| <b>Total sugars<sup>1</sup></b>  |                |       |       |              |       |       |
| (Equiv. $\beta$ -D-glucose)      | 27.62          | 25.77 | 22.04 | 16.26        | 12.22 | 10.87 |
| <b>Proteins<sup>1</sup></b>      |                |       |       |              |       |       |
| (Equiv. BSA)                     | 3.22           | 1.67  | 2.53  | 3.89         | 0.51  | 1.03  |
| <b>Lipids<sup>2</sup></b>        | 11.62          | 10.29 | 10.72 | 8.49         | 7.91  | 9.61  |

<sup>1</sup>Values determined from the water extracts and expressed as percentages of TS-WE (see Experimental).

<sup>2</sup>Values obtained from extraction of CGs/CBs with *n*-hexane, expressed as percentages (see Experimental).

**Table S2.** Dipole moments and hyperpolarizabilities of NAs [1].

| Analyte                   | $\mu/D$ | $\beta/10^{-30}$ esu |
|---------------------------|---------|----------------------|
| <i>p</i> -NA <sup>1</sup> | 6.2     | 34.5                 |
| <i>o</i> -NA <sup>2</sup> | 4.3     | 10.2                 |
| <i>m</i> -NA <sup>2</sup> | 4.9     | 6.0                  |

Solvent: <sup>1</sup> Methanol; <sup>2</sup> Acetone.

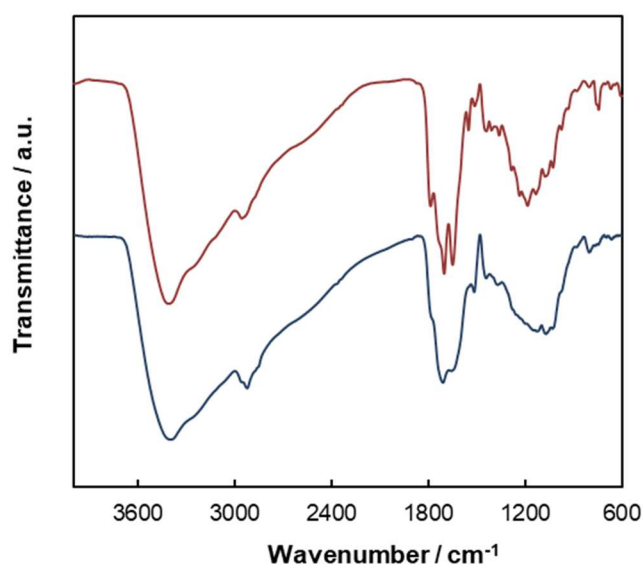**Figure S1.** FTIR spectra (KBr) of CGsSV (blue line) and CBsSV (brown line).

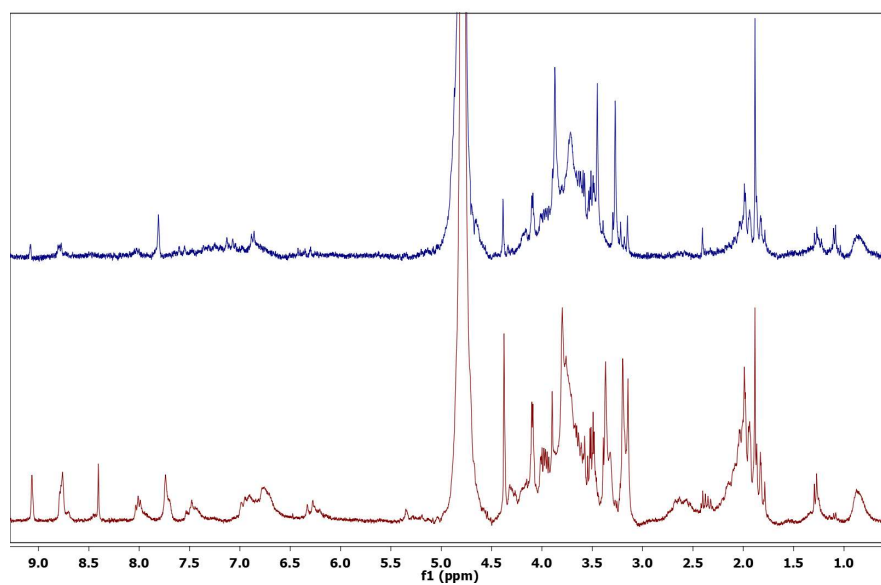

**Figure S2.**  $^1\text{H}$  NMR spectra of CGsSV (blue line) and CBsSV (brown line) (300 MHz,  $\text{D}_2\text{O}$ , 25  $^\circ\text{C}$ ).

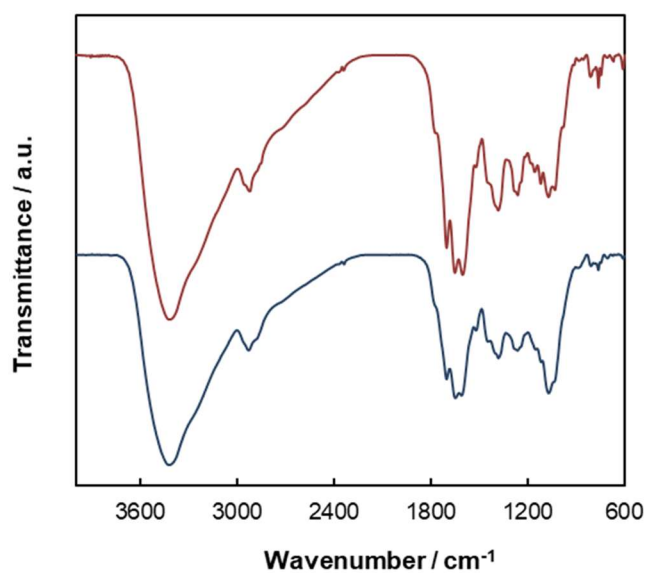

**Figure S3.** FTIR spectra (KBr) of CGsNP (blue line) and CBsNP (brown line).

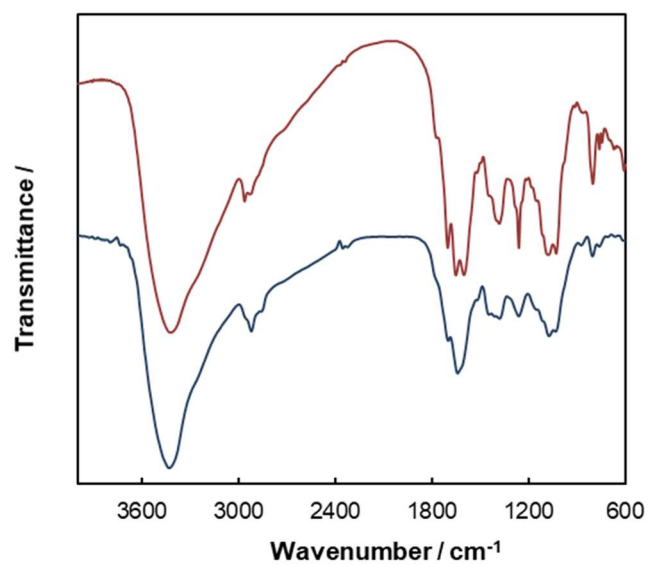

**Figure S4.** FTIR spectra (KBr) of CGsCQ (blue line) and CBsCQ (brown line).

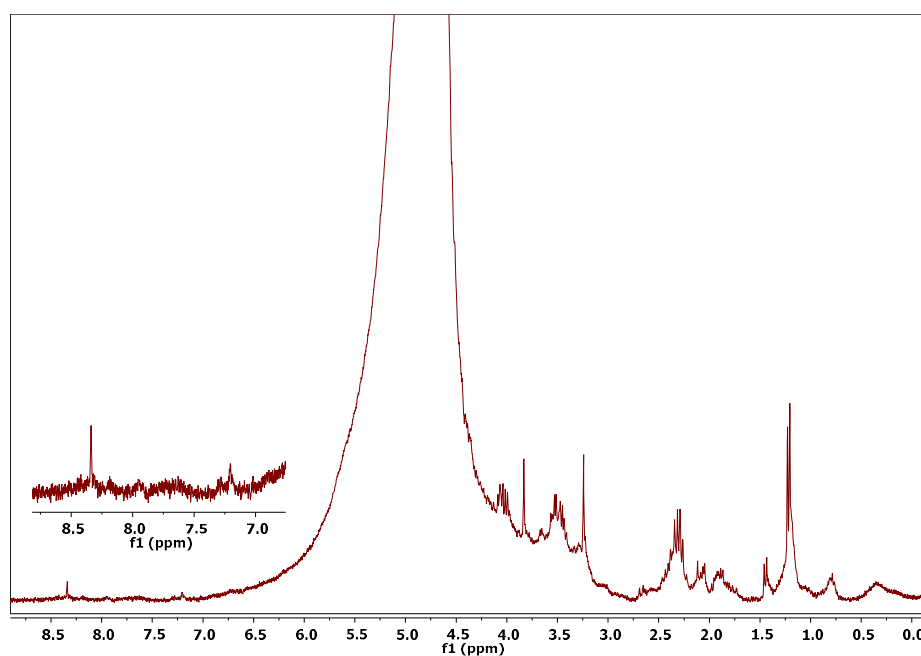

**Figure S5.** <sup>1</sup>H NMR spectrum (300 MHz, D<sub>2</sub>O, 25 °C) of C-dots from CGsSV by HTC method.

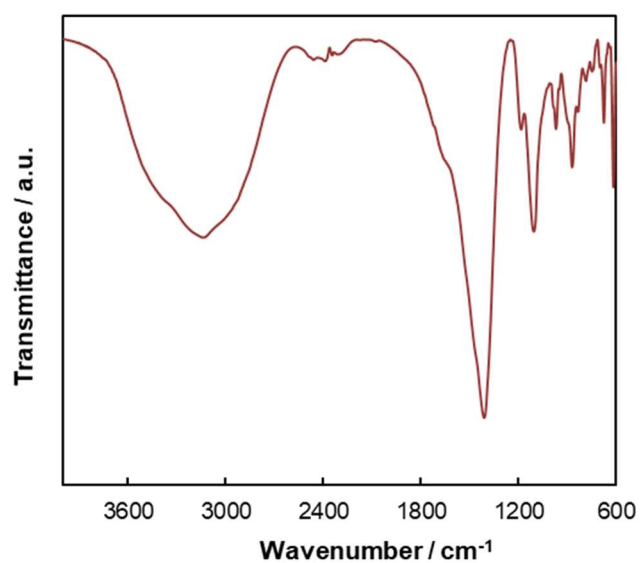

**Figure S6.** FTIR spectrum (KBr) of C-dots' ashes from HTC method.

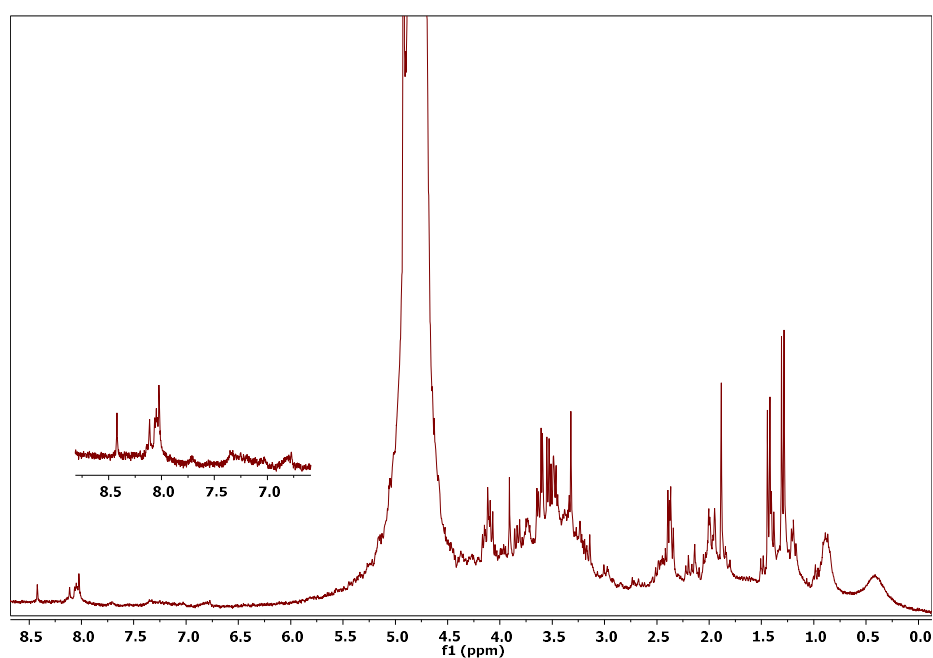

**Figure S7.**  $^1\text{H}$  NMR spectrum (300 MHz,  $\text{D}_2\text{O}$ , 25  $^\circ\text{C}$ ) of C-dots from CGsSV by Mw-HTC method.

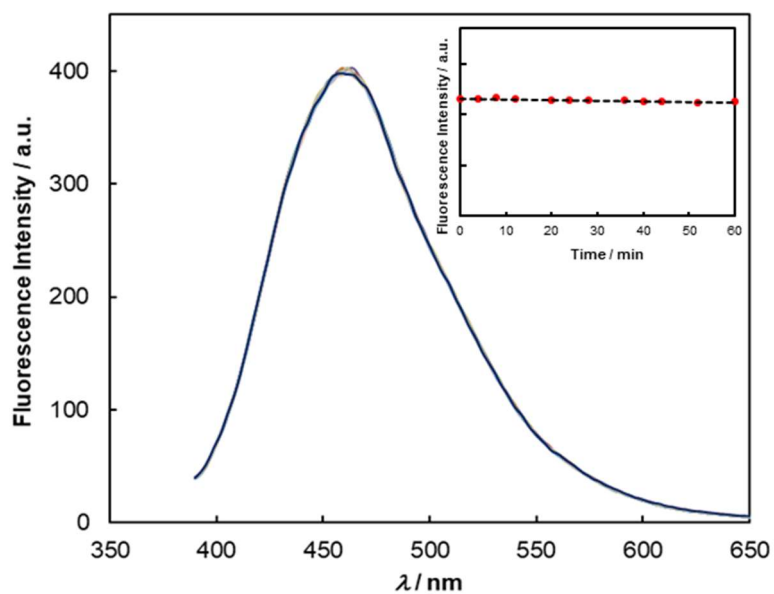

**Figure S8.** Emission spectra of aqueous dispersions (0.1 mg/mL) of C-dots ( $\lambda_{\text{em}} = 461$  nm) obtained by HTC in the presence of ED upon continuous irradiation ( $\lambda_{\text{exc}} = 380$  nm) for 1h.

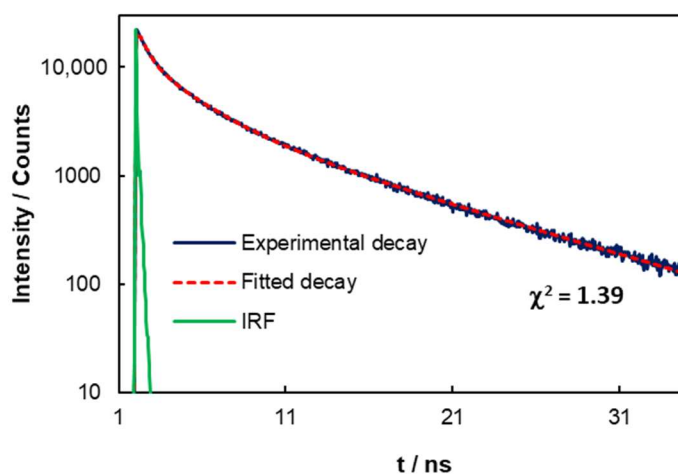

**Figure S9.** Intensity decay of aqueous dispersions of C-dots (Mw-HTC) excited at 340 nm and observed at 447 nm.

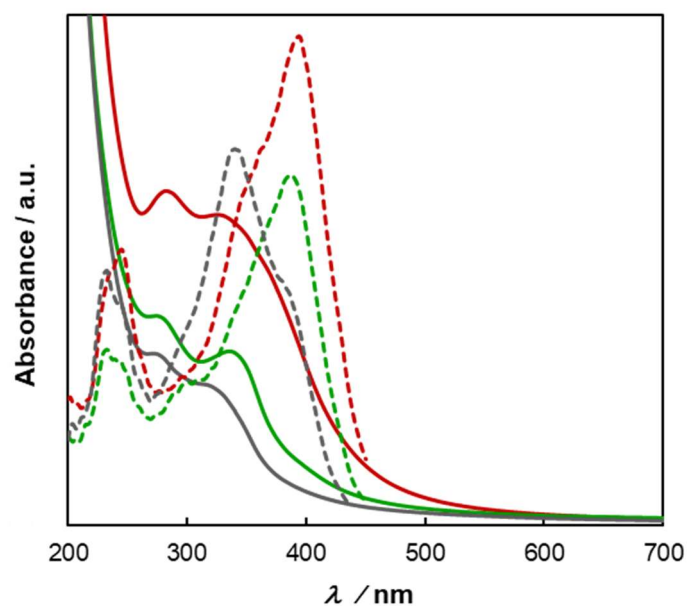

**Figure S10.** UV-Vis and excitation (dashed lines, monitored at the corresponding emission maximum) spectra of aqueous dispersions (0.1 mg/mL) of C-dots prepared at 200 °C (red line), 250 °C (green line) and 300 °C (grey line) under the conditions reported in Table 2.

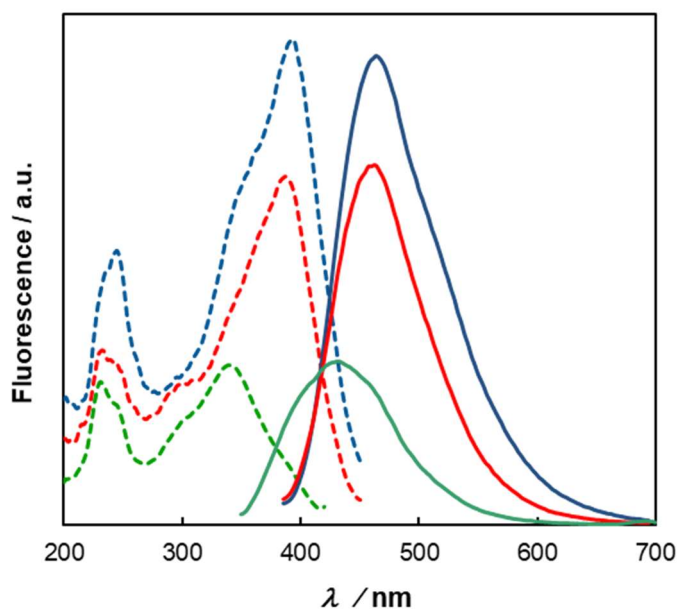

**Figure S11.** Emission ( $\lambda_{\text{exc}} = 380$  nm; solid lines) and excitation (dashed lines, monitored at the corresponding emission maximum) spectra of aqueous dispersions (0.1 mg/mL) of C-dots prepared at 200 °C (blue lines), 250 °C (red lines) and 300 °C (green lines), under the conditions reported in Table 2.

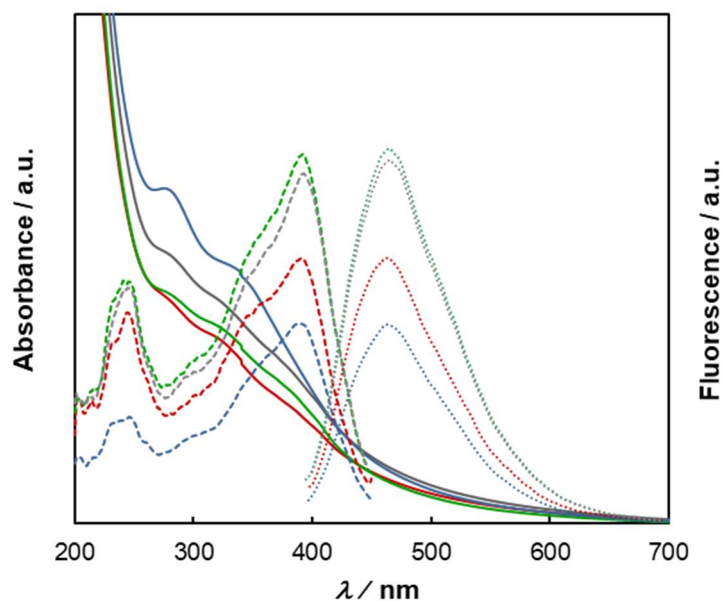

**Figure S12.** UV-Vis (solid lines), emission (dotted lines,  $\lambda_{exc} = 380$  nm) and excitation (dashed lines, monitored at the corresponding emission maximum) spectra of aqueous dispersions (0.1 mg/mL) of C-dots prepared by Mw-HTC method with different CGs concentrations (30 mg/mL; red), (100 mg/mL; green) and (200 mg/mL; grey) at 190 °C during 15 min. For comparison, the C-dots obtained after 3h heating at the lowest CGs concentration, keeping the other reaction conditions, is also shown (blue lines).

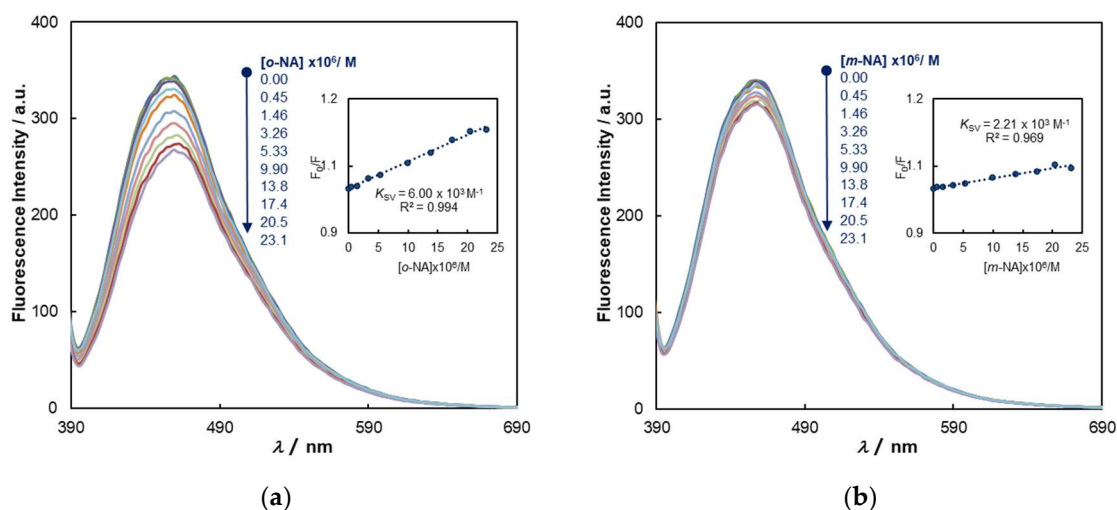

**Figure S13.** Emission spectra of C-dots (0.01 mg/mL) after successive additions ( $4.47 \times 10^{-7}$ – $2.31 \times 10^{-5}$  M) of *o*-NA (a) and *m*-NA (b) ( $\lambda_{exc} = 380$  nm). Inset: Stern-Volmer plot after correction for *h*-IFE.

1. Oudar, J.L.; Chemla, D.S. Hyperpolarizabilities of nitroanilines. *J. Chem. Phys.* **1977**, *66*, 2664–2668. <https://doi.org/10.1063/1.434213>.
